# Supplementary material for: Therapeutic senescence via GPCR activation in synovial fibroblasts facilitates resolution of arthritis
Source: PubMed Central journal article supplement (PMC7005314; doi:10.1038/s41467-020-14421-x), 2020-02-06
Supplement: 41467_2020_14421_MOESM1_ESM.pdf [file 41467_2020_14421_MOESM1_ESM.pdf]

## **Supplementary Information**

**Therapeutic senescence via GPCR activation in synovial fibroblasts facilitates resolution of arthritis**

Montero-Melendez T *et al.*

**Supplementary Table 1.** Summary of clinical details of patients (n=20) at the time of fibroblasts sample collection (mean±SD).

|                                  | <b>Patients</b>                                                 |
|----------------------------------|-----------------------------------------------------------------|
| <b>Age</b> -years-               | 50 ± 14.55                                                      |
| <b>Female, n (%)</b>             | 10 (50%)                                                        |
| <b>ESR</b> -mm/h-                | 29 ± 22.8                                                       |
| <b>CRP</b> -mg/l-                | 24 ± 23.4                                                       |
| <b>DAS28ESR</b>                  | 5 ± 1.5                                                         |
| <b>Symptom duration</b> -weeks-  | 342 ± 559                                                       |
| <b>IgM-RF<sup>+</sup>, n (%)</b> | 9 (45%)                                                         |
| <b>CCP<sup>+</sup>, n (%)</b>    | 5 (25%)                                                         |
| <b>Ethnicity, n (%)</b>          | White British: 17 (85%)<br>Caribbean: 2 (10%)<br>Indian: 1 (5%) |

**Supplementary Table 2.** Primers used in this study.

| PCR primers                             |        |            |
|-----------------------------------------|--------|------------|
| Hs_ADAMTS2_1_SG QuantiTect Primer Assay | QIAGEN | QT00020083 |
| Hs_AGRP_1_SG QuantiTect Primer Assay    | QIAGEN | QT00204477 |
| Hs_ASIP_1_SG QuantiTect Primer Assay    | QIAGEN | QT00061509 |
| Hs_BMP2_1_SG QuantiTect Primer Assay    | QIAGEN | QT00012544 |
| Hs_CD74_1_SG QuantiTect Primer Assay    | QIAGEN | QT00059402 |
| Hs_CDH11_1_SG QuantiTect Primer Assay   | QIAGEN | QT00019418 |
| Hs_CDKN1A_1_SG QuantiTect Primer Assay  | QIAGEN | QT00062090 |
| Hs_CDKN2A_1_SG QuantiTect Primer Assay  | QIAGEN | QT00089964 |
| Hs_COL3A1_1_SG QuantiTect Primer Assay  | QIAGEN | QT00058233 |
| Hs_COL3A1_1_SG QuantiTect Primer Assay  | QIAGEN | QT00058233 |
| Hs_COL5A1_1_SG QuantiTect Primer Assay  | QIAGEN | QT00044527 |
| Hs_CTSK_1_SG QuantiTect Primer Assay    | QIAGEN | QT00093856 |
| Hs_CTSL_1_SG QuantiTect Primer Assay    | QIAGEN | QT01664978 |
| Hs_DMKN_1_SG QuantiTect Primer Assay    | QIAGEN | QT00057897 |
| Hs_FGF2_1_SG QuantiTect Primer Assay    | QIAGEN | QT00047579 |
| Hs_FTL_1_SG QuantiTect Primer Assay     | QIAGEN | QT00055860 |
| Hs_GLB1_1_SG QuantiTect Primer Assay    | QIAGEN | QT00066206 |
| Hs_GPBAR1_1_SG QuantiTect Primer Assay  | QIAGEN | QT00209594 |
| Hs_GHSR_1_SG QuantiTect Primer Assay    | QIAGEN | QT00040901 |
| Hs_HMGCR_1_SG QuantiTect Primer Assay   | QIAGEN | QT00004081 |
| Hs_HMOX1_1_SG QuantiTect Primer Assay   | QIAGEN | QT00092645 |
| Hs_HPRT1_1_SG QuantiTect Primer Assay   | QIAGEN | QT00059066 |
| Hs_HRAS_2_SG QuantiTect Primer Assay    | QIAGEN | QT01668338 |
| Hs_HSD3B7_2_SG QuantiTect Primer Assay  | QIAGEN | QT02316300 |
| Hs_ICAM1_1_SG QuantiTect Primer Assay   | QIAGEN | QT00074900 |
| Hs_INSIG1_1_SG QuantiTect Primer Assay  | QIAGEN | QT00090314 |
| Hs_LDLR_1_SG QuantiTect Primer Assay    | QIAGEN | QT00045864 |
| Hs_MC1R_1_SG QuantiTect Primer Assay    | QIAGEN | QT01004241 |
| Hs_MC2R_2_SG QuantiTect Primer Assay    | QIAGEN | QT01155007 |
| Hs_MC3R_1_SG QuantiTect Primer Assay    | QIAGEN | QT00209895 |
| Hs_MC4R_1_SG QuantiTect Primer Assay    | QIAGEN | QT00245595 |
| Hs_MC5R_1_SG QuantiTect Primer Assay    | QIAGEN | QT00211960 |
| Hs_MMP11_1_SG QuantiTect Primer Assay   | QIAGEN | QT00024031 |

|                                          |               |                   |
|------------------------------------------|---------------|-------------------|
| Hs_MRAP_1_SG QuantiTect Primer Assay     | QIAGEN        | QT00103866        |
| Hs_MRAP2_1_SG QuantiTect Primer Assay    | QIAGEN        | QT00493150        |
| Hs_PCSK1_1_SG QuantiTect Primer Assay    | QIAGEN        | QT00013853        |
| Hs_PCSK2_1_SG QuantiTect Primer Assay    | QIAGEN        | QT00054754        |
| Hs_POMC_1_SG QuantiTect Primer Assay     | QIAGEN        | QT00001204        |
| Hs_POSTN_1_SG QuantiTect Primer Assay    | QIAGEN        | QT00023800        |
| Hs_PTEN_1_SG QuantiTect Primer Assay     | QIAGEN        | QT00086933        |
| Hs_TNC_1_SG QuantiTect Primer Assay      | QIAGEN        | QT00024409        |
| Hs_TP53_1_SG QuantiTect Primer Assay     | QIAGEN        | QT00060235        |
| MC1R-Forward: 5'-GAAGAACTGTGGGGACCTGG-3' | Sigma-Aldrich | In-house designed |
| MC1R-Reverse: 5'-GGGTCACACAGGAACCAGAC-3' | Sigma-Aldrich | In-house designed |

### Supplementary Table 3. Extended information on genes identified by RNAseq.

| Symbol                                      | Gene name                                                                    | FC   | Refseq ID    | Locus                        |
|---------------------------------------------|------------------------------------------------------------------------------|------|--------------|------------------------------|
| <b>qPCR validation (Related to Fig3A,B)</b> |                                                                              |      |              |                              |
| ADAMTS2                                     | ADAM metalloproteinase with thrombospondin type 1 motif 2                    | 0.79 | NM_014244    | chr5 : 179110850 - 179345430 |
| CD74                                        | CD74 molecule, major histocompatibility complex, class II invariant chain    | 0.74 | NM_004355    | chr5 : 150401636 - 150412936 |
| CDH11                                       | cadherin 11, type 2, OB-cadherin (osteoblast)                                | 0.84 | NM_001797    | chr16 : 64943752 - 65122137  |
| CDKN2A                                      | cyclin-dependent kinase inhibitor 2A                                         | 1.09 | NM_000077    | chr9 : 21967751 - 21975133   |
| COL3A1                                      | collagen, type III, alpha 1                                                  | 0.65 | NM_000090    | chr2 : 188974372 - 189012746 |
| COL5A1                                      | collagen, type V, alpha 1                                                    | 0.72 | NM_000093    | chr9 : 134641804 - 134844842 |
| CTSK                                        | cathepsin K                                                                  | 1.99 | NM_000396    | chr1 : 150796207 - 150808441 |
| DMKN                                        | dermokine                                                                    | 1.79 | NM_001035516 | chr19 : 35497216 - 35501911  |
| HMGCR                                       | 3-hydroxy-3-methylglutaryl-CoA reductase                                     | 1.53 | NM_001130996 | chr5 : 75337167 - 75362101   |
| HMOX1                                       | heme oxygenase 1                                                             | 1.58 | NM_002133    | chr22 : 35381066 - 35394214  |
| HRAS                                        | Harvey rat sarcoma viral oncogene homolog                                    | 1.12 | NM_001130442 | chr11 : 532241 - 535567      |
| HSD3B7                                      | hydroxy-delta-5-steroid dehydrogenase, 3 beta- and steroid delta-isomerase 7 | 1.41 | NM_001142777 | chr16 : 30985197 - 30989152  |
| INSIG1                                      | insulin induced gene 1                                                       | 1.98 | NM_005542    | chr7 : 155297775 - 155310235 |
| LDLR                                        | low density lipoprotein receptor                                             | 2.04 | NM_001195799 | chr19 : 11089361 - 11133829  |
| MMP11                                       | matrix metalloproteinase 11                                                  | 1.29 | NM_005940    | chr22 : 23772818 - 23784316  |
| POSTN                                       | periostin, osteoblast specific factor                                        | 0.80 | NM_006475    | chr13 : 37562581 - 37598844  |
| PTEN                                        | phosphatase and tensin homolog                                               | 0.89 | NM_000314    | chr10 : 87863437 - 87971930  |
| TNC                                         | tenascin C                                                                   | 0.75 | NM_002160    | chr9 : 115019575 - 115118257 |

### Senescence profile (Related to Figure 3C)

|               |                                                           |      |              |                             |
|---------------|-----------------------------------------------------------|------|--------------|-----------------------------|
| <b>BAG1</b>   | BCL2 associated athanogene 1                              | 1.12 | NM_001172415 | chr9 : 33252470 - 33264761  |
| <b>BCL2</b>   | B-cell CLL/lymphoma 2                                     | 1.58 | NM_000633    | chr18 : 63123345 - 63319380 |
| <b>BCL2L1</b> | BCL2-like 1                                               | 1.39 | NM_001191    | chr20 : 31664451 - 31723098 |
| <b>CCND2</b>  | cyclin D2                                                 | 0.91 | NM_001759    | chr12 : 4273735 - 4305356   |
| <b>CCNI</b>   | cyclin I                                                  | 0.91 | NM_006835    | chr4 : 77048020 - 77075972  |
| <b>CDC7</b>   | cell division cycle 7                                     | 0.79 | NM_003503    | chr1 : 91500846 - 91525764  |
| <b>CDK6</b>   | cyclin-dependent kinase 6                                 | 0.83 | NM_001259    | chr7 : 92604920 - 92833917  |
| <b>CDK5R1</b> | cyclin-dependent kinase 5, regulatory subunit 1 (p35)     | 0.81 | NM_003885    | chr17 : 32487086 - 32491253 |
| <b>CDKN1A</b> | cyclin-dependent kinase inhibitor 1A (p21, Cip1)          | 1.39 | NM_001291549 | chr6 : 36676536 - 36687339  |
| <b>CDKN2A</b> | cyclin-dependent kinase inhibitor 2A (p16)                | 1.09 | NM_000077    | chr9 : 21967751 - 21975133  |
| <b>CDKN2B</b> | cyclin-dependent kinase inhibitor 2B (p15, inhibits CDK4) | 1.29 | NM_004936    | chr9 : 22002902 - 22009313  |
| <b>E2F7</b>   | E2F transcription factor 7                                | 1.43 | NM_203394    | chr12 : 77021245 - 77065580 |
| <b>PTEN</b>   | phosphatase and tensin homolog                            | 0.89 | NM_000314    | chr10 : 87863437 - 87971930 |
| <b>RBBP9</b>  | retinoblastoma binding protein 9                          | 1.13 | NM_006606    | chr20 : 18486540 - 18497243 |

### Extracellular matrix (Related to Figure 3F)

|                 |                                                           |      |           |                               |
|-----------------|-----------------------------------------------------------|------|-----------|-------------------------------|
| <b>ADAMTS1</b>  | ADAM metallopeptidase with thrombospondin type 1 motif 1  | 0.71 | NM_006988 | chr21 : 26836286 - 26845409   |
| <b>ADAMTS12</b> | ADAM metallopeptidase with thrombospondin type 1 motif 12 | 0.80 | NM_030955 | chr5 : 33527180 - 33892019    |
| <b>ADAMTS15</b> | ADAM metallopeptidase with thrombospondin type 1 motif 15 | 0.67 | NM_139055 | chr11 : 130448973 - 130476644 |
| <b>ADAMTS16</b> | ADAM metallopeptidase with thrombospondin type 1 motif 16 | 0.77 | NM_139056 | chr5 : 5140329 - 5320299      |
| <b>ADAMTS2</b>  | ADAM metallopeptidase with thrombospondin type 1 motif 2  | 0.79 | NM_014244 | chr5 : 179110850 - 179345430  |
| <b>ADAMTS3</b>  | ADAM metallopeptidase with thrombospondin type 1 motif 3  | 0.64 | NM_014243 | chr4 : 72280968 - 72568799    |
| <b>B4GAT1</b>   | beta-1,4-glucuronyltransferase 1                          | 0.90 | NM_006876 | chr11 : 66345371 - 66347690   |
| <b>COL1A1</b>   | collagen, type I, alpha 1                                 | 0.80 | NM_000088 | chr17 : 50184095 - 50201639   |
| <b>COL3A1</b>   | collagen, type III, alpha 1                               | 0.65 | NM_000090 | chr2 : 188974372 - 189012746  |

|                |                                                  |      |              |                               |
|----------------|--------------------------------------------------|------|--------------|-------------------------------|
| <b>COL5A1</b>  | collagen, type V, alpha 1                        | 0.72 | NM_000093    | chr9 : 134641804 - 134844842  |
| <b>COL5A3</b>  | collagen, type V, alpha 3                        | 0.67 | NM_015719    | chr19 : 9959560 - 10010471    |
| <b>COL6A1</b>  | collagen, type VI, alpha 1                       | 0.78 | NM_001848    | chr21 : 45981748 - 46005049   |
| <b>COL14A1</b> | collagen, type XIV, alpha 1                      | 0.74 | NM_021110    | chr8 : 120125107 - 120372034  |
| <b>DPP4</b>    | dipeptidyl-peptidase 4                           | 1.27 | NM_001935    | chr2 : 161992244 - 162074542  |
| <b>GALNT12</b> | polypeptide N-acetylgalactosaminyltransferase 12 | 1.53 | NM_024642    | chr9 : 98807698 - 98850081    |
| <b>GLT8D1</b>  | glycosyltransferase 8 domain containing 1        | 0.90 | NM_152932    | chr3 : 52694483 - 52703698    |
| <b>LAMA2</b>   | laminin subunit alpha 2                          | 0.87 | NM_001079823 | chr6 : 128883140 - 129516565  |
| <b>LARGE</b>   | like-glycosyltransferase                         | 1.21 | NM_004737    | chr22 : 33273075 - 33920428   |
| <b>LOXL2</b>   | lysyl oxidase like 2                             | 0.86 | NM_002318    | chr8 : 23296896 - 23404209    |
| <b>MME</b>     | membrane metallo-endopeptidase                   | 1.76 | NM_007288    | chr3 : 155080163 - 155183729  |
| <b>MMP11</b>   | matrix metallopeptidase 11                       | 1.29 | NM_005940    | chr22 : 23772818 - 23784316   |
| <b>MMP3</b>    | matrix metallopeptidase 3                        | 1.48 | NM_002422    | chr11 : 102835796 - 102843689 |

### Cell cycle regulation (Related to Figure 3F)

|              |                                                 |      |           |                               |
|--------------|-------------------------------------------------|------|-----------|-------------------------------|
| <b>CCND2</b> | cyclin D2                                       | 0.91 | NM_001759 | chr12 : 4273735 - 4305356     |
| <b>CDC7</b>  | cell division cycle 7                           | 0.79 | NM_003503 | chr1 : 91500846 - 91525764    |
| <b>CDIP1</b> | cell death-inducing p53 target 1                | 1.17 | NM_013399 | chr16 : 4510675 - 4538815     |
| <b>CDK6</b>  | cyclin-dependent kinase 6                       | 0.83 | NM_001259 | chr7 : 92604920 - 92833917    |
| <b>CNTRL</b> | centriolin                                      | 0.84 | NM_007018 | chr9 : 121088295 - 121177608  |
| <b>FIGN</b>  | fidgetin                                        | 0.88 | NM_018086 | chr2 : 163607607 - 163736003  |
| <b>G2E3</b>  | G2/M-phase specific E3 ubiquitin protein ligase | 0.93 | NM_017769 | chr14 : 30559122 - 30620061   |
| <b>GAS1</b>  | growth arrest specific 1                        | 0.69 | NM_002048 | chr9 : 86944361 - 86947189    |
| <b>ING1</b>  | inhibitor of growth family member 1             | 0.85 | NM_005537 | chr13 : 110715011 - 110721074 |
| <b>RBBP9</b> | retinoblastoma binding protein 9                | 1.13 | NM_006606 | chr20 : 18486540 - 18497243   |

### Lysosome markers (Related to Figure 3F)

|                 |                                                           |      |              |                              |
|-----------------|-----------------------------------------------------------|------|--------------|------------------------------|
| <b>ARSG</b>     | arylsulfatase G                                           | 1.36 | NM_001267727 | chr17 : 68291494 - 68420859  |
| <b>ATP6V0A1</b> | ATPase, H+ transporting, lysosomal V0 subunit a1          | 1.22 | NM_005177    | chr17 : 42458843 - 42522579  |
| <b>ATP6V1H</b>  | ATPase, H+ transporting, lysosomal 50/57kDa, V1 subunit H | 1.25 | NM_213620    | chr8 : 53715542 - 53843042   |
| <b>CTSK</b>     | cathepsin K                                               | 1.99 | NM_000396    | chr1 : 150796207 - 150808441 |
| <b>CTSL</b>     | cathepsin L                                               | 1.23 | NM_001912    | chr9 : 87726058 - 87731469   |
| <b>CTSS</b>     | cathepsin S                                               | 1.33 | NM_001199739 | chr1 : 150730195 - 150765957 |
| <b>LIPA</b>     | lipase A, lysosomal acid, cholesterol esterase            | 1.19 | NM_000235    | chr10 : 89213568 - 89252039  |
| <b>M6PR</b>     | mannose-6-phosphate receptor (cation dependent)           | 1.21 | NM_001207024 | chr12 : 8940360 - 8949761    |
| <b>NPC1</b>     | Niemann-Pick disease, type C1                             | 1.56 | NM_000271    | chr18 : 23531498 - 23586617  |
| <b>NPC2</b>     | Niemann-Pick disease, type C2                             | 1.25 | NM_006432    | chr14 : 74479939 - 74493381  |

### Synovial Fibroblast aggressiveness (Related to Figure 3G)

|               |                                                                           |      |              |                              |
|---------------|---------------------------------------------------------------------------|------|--------------|------------------------------|
| <b>CCL2</b>   | chemokine (C-C motif) ligand 2                                            | 0.77 | NM_002982    | chr17 : 34255276 - 34257201  |
| <b>CD74</b>   | CD74 molecule, major histocompatibility complex, class II invariant chain | 0.74 | NM_004355    | chr5 : 150401636 - 150412936 |
| <b>CXCL16</b> | chemokine (C-X-C motif) ligand 16                                         | 0.85 | NM_022059    | chr17 : 4733528 - 4739928    |
| <b>IL17RC</b> | interleukin 17 receptor C                                                 | 0.92 | NM_001203263 | chr3 : 9917073 - 9933621     |
| <b>IL18R1</b> | interleukin 18 receptor 1                                                 | 0.75 | NM_003855    | chr2 : 102356282 - 102398775 |
| <b>ITGA9</b>  | integrin subunit alpha 9                                                  | 0.65 | NM_002207    | chr3 : 37452321 - 37819790   |
| <b>ITGA11</b> | integrin subunit alpha 11                                                 | 0.87 | NM_001004439 | chr15 : 68301703 - 68432153  |
| <b>MSTN</b>   | myostatin                                                                 | 0.50 | NM_005259    | chr2 : 190055699 - 190062729 |
| <b>PTGS2</b>  | prostaglandin-endoperoxide synthase 2                                     | 0.82 | NM_000963    | chr1 : 186671811 - 186680427 |
| <b>SENP1</b>  | SUMO1/sentrin specific peptidase 1                                        | 0.90 | NM_001267595 | chr12 : 48042897 - 48105992  |
| <b>THBS4</b>  | thrombospondin 4                                                          | 0.76 | NM_001306212 | chr5 : 79991295 - 80083284   |
| <b>TNC</b>    | tenascin C                                                                | 0.75 | NM_002160    | chr9 : 115019575 - 115118257 |
| <b>VCAM1</b>  | vascular cell adhesion molecule 1                                         | 0.65 | NM_080682    | chr1 : 100719639 - 100739046 |



|              |                                      |      |              |                            |
|--------------|--------------------------------------|------|--------------|----------------------------|
| <b>VEGFA</b> | vascular endothelial growth factor A | 0.85 | NM_001204385 | chr6 : 43770208 - 43786486 |
|--------------|--------------------------------------|------|--------------|----------------------------|

### Identified from Cell Age (Related to Figure 3H)

|                |                                                                        |      |              |                               |
|----------------|------------------------------------------------------------------------|------|--------------|-------------------------------|
| <b>ACLY</b>    | ATP citrate lyase                                                      | 1.15 | NM_001303275 | chr17 : 41866916 - 41919022   |
| <b>BHLHE40</b> | basic helix-loop-helix family member e40                               | 1.17 | NM_003670    | chr3 : 4979411 - 4985180      |
| <b>BTG3</b>    | BTG family member 3                                                    | 1.16 | NM_006806    | chr21 : 17593649 - 17612950   |
| <b>CCND1</b>   | cyclin D1                                                              | 1.27 | NM_053056    | chr11 : 69641104 - 69654474   |
| <b>CDK6</b>    | cyclin-dependent kinase 6                                              | 0.83 | NM_001259    | chr7 : 92604920 - 92833917    |
| <b>CDKN1A</b>  | cyclin-dependent kinase inhibitor 1A (p21, Cip1)                       | 1.39 | NM_001291549 | chr6 : 36676536 - 36687339    |
| <b>CDKN1B</b>  | cyclin-dependent kinase inhibitor 1B (p27, Kip1)                       | 0.86 | NM_004064    | chr12 : 12717269 - 12722382   |
| <b>CDKN2A</b>  | cyclin-dependent kinase inhibitor 2A (p16)                             | 1.09 | NM_000077    | chr9 : 21967751 - 21975133    |
| <b>CDKN2B</b>  | cyclin-dependent kinase inhibitor 2B (p15, inhibits CDK4)              | 1.29 | NM_004936    | chr9 : 22002902 - 22009313    |
| <b>CPEB1</b>   | cytoplasmic polyadenylation element binding protein 1                  | 1.28 | NM_001288819 | chr15 : 82543200 - 82647605   |
| <b>CXCL1</b>   | chemokine (C-X-C motif) ligand 1                                       | 0.53 | NM_001511    | chr4 : 73869391 - 73871302    |
| <b>DHCR24</b>  | 24-dehydrocholesterol reductase                                        | 1.48 | NM_014762    | chr1 : 54849626 - 54887248    |
| <b>DUSP3</b>   | dual specificity phosphatase 3                                         | 1.19 | NM_004090    | chr17 : 43766120 - 43779000   |
| <b>HDAC4</b>   | histone deacetylase 4                                                  | 0.89 | NM_006037    | chr2 : 239048167 - 239400949  |
| <b>HRAS</b>    | Harvey rat sarcoma viral oncogene homolog                              | 1.12 | NM_001130442 | chr11 : 532241 - 535567       |
| <b>HSPB2</b>   | heat shock protein family B (small) member 2                           | 1.23 | NM_001541    | chr11 : 111912735 - 111914093 |
| <b>ID1</b>     | inhibitor of DNA binding 1, dominant negative helix-loop-helix protein | 0.79 | NM_002165    | chr20 : 31605282 - 31606514   |
| <b>ING1</b>    | inhibitor of growth family member 1                                    | 0.85 | NM_005537    | chr13 : 110715011 - 110721074 |
| <b>KDM5B</b>   | lysine (K)-specific demethylase 5B                                     | 0.91 | NM_006618    | chr1 : 202725184 - 202809470  |
| <b>LIMK1</b>   | LIM domain kinase 1                                                    | 1.26 | NM_001204426 | chr7 : 74093155 - 74122525    |
| <b>MAP2K3</b>  | mitogen-activated protein kinase kinase 3                              | 1.15 | NM_002756    | chr17 : 21288035 - 21315239   |
| <b>MVK</b>     | mevalonate kinase                                                      | 1.53 | NM_000431    | chr12 : 109573694 - 109597270 |
| <b>NOTCH3</b>  | notch 3                                                                | 0.84 | NM_000435    | chr19 : 15159632 - 15200981   |

|               |                                                            |      |              |                              |
|---------------|------------------------------------------------------------|------|--------------|------------------------------|
| <b>NTN4</b>   | netrin 4                                                   | 1.13 | NM_021229    | chr12 : 95657806 - 95790758  |
| <b>P3H1</b>   | prolyl 3-hydroxylase 1                                     | 0.84 | NM_022356    | chr1 : 42746334 - 42767084   |
| <b>PRKCH</b>  | protein kinase C, eta                                      | 0.81 | NM_006255    | chr14 : 61321442 - 61550980  |
| <b>PSMD14</b> | proteasome 26S subunit, non-ATPase 14                      | 1.13 | NM_005805    | chr2 : 161308274 - 161411717 |
| <b>RNASEL</b> | ribonuclease L (2',5'-oligoadenylate synthetase-dependent) | 0.88 | NM_021133    | chr1 : 182573633 - 182589259 |
| <b>SENP1</b>  | SUMO1/sentrin specific peptidase 1                         | 0.90 | NM_001267595 | chr12 : 48042897 - 48105992  |
| <b>SENP7</b>  | SUMO1/sentrin specific peptidase 7                         | 0.91 | NM_001077203 | chr3 : 101324188 - 101513241 |
| <b>SIX1</b>   | SIX homeobox 1                                             | 0.89 | NM_005982    | chr14 : 60644698 - 60649437  |
| <b>SMG1</b>   | SMG1 phosphatidylinositol 3-kinase-related kinase          | 0.93 | NM_015092    | chr16 : 18804852 - 18926404  |
| <b>SREBF1</b> | sterol regulatory element binding transcription factor 1   | 1.77 | NM_001005291 | chr17 : 17811348 - 17837011  |
| <b>TXN</b>    | thioredoxin                                                | 1.10 | NM_003329    | chr9 : 110243811 - 110256640 |
| <b>VEGFA</b>  | vascular endothelial growth factor A                       | 0.85 | NM_001204385 | chr6 : 43770208 - 43786486   |
| <b>WNT2</b>   | wingless-type MMTV integration site family member 2        | 0.56 | NR_024047    | chr7 : 117276630 - 117323289 |
| <b>ZFP36</b>  | ZFP36 ring finger protein                                  | 0.92 | NM_003407    | chr19 : 39406846 - 39409412  |

### Identified from TiRe (Related to Figure 3H)

|                 |                                                          |      |              |                               |
|-----------------|----------------------------------------------------------|------|--------------|-------------------------------|
| <b>ADAMTS1</b>  | ADAM metallopeptidase with thrombospondin type 1 motif 1 | 0.71 | NM_006988    | chr21 : 26836286 - 26845409   |
| <b>ADRA2A</b>   | adrenoceptor alpha 2A                                    | 0.75 | NM_000681    | chr10 : 111077031 - 111080904 |
| <b>AHR</b>      | aryl hydrocarbon receptor                                | 0.75 | NM_001621    | chr7 : 17298651 - 17346151    |
| <b>ANGPTL4</b>  | angiopoietin like 4                                      | 0.76 | NR_104213    | chr19 : 8364126 - 8374375     |
| <b>ARHGAP1</b>  | Rho GTPase activating protein 1                          | 1.14 | NM_004308    | chr11 : 46677074 - 46700665   |
| <b>B4GALNT1</b> | beta-1,4-N-acetyl-galactosaminyl transferase 1           | 1.20 | NM_001276469 | chr12 : 57629330 - 57633239   |
| <b>CCL2</b>     | chemokine (C-C motif) ligand 2                           | 0.77 | NM_002982    | chr17 : 34255276 - 34257201   |
| <b>CD151</b>    | CD151 molecule (Raph blood group)                        | 1.07 | NM_139030    | chr11 : 832951 - 838835       |
| <b>CDKN1B</b>   | cyclin-dependent kinase inhibitor 1B (p27, Kip1)         | 0.86 | NM_004064    | chr12 : 12717269 - 12722382   |
| <b>COL1A1</b>   | collagen, type I, alpha 1                                | 0.80 | NM_000088    | chr17 : 50184095 - 50201639   |

|                 |                                                         |      |              |                              |
|-----------------|---------------------------------------------------------|------|--------------|------------------------------|
| <b>CXXC5</b>    | CXXC finger protein 5                                   | 0.88 | NM_001317204 | chr5 : 139648924 - 139683885 |
| <b>ESR1</b>     | estrogen receptor 1                                     | 1.16 | NM_000125    | chr6 : 151807678 - 152103273 |
| <b>FGF2</b>     | fibroblast growth factor 2 (basic)                      | 1.21 | NM_002006    | chr4 : 122826707 - 122898235 |
| <b>HMOX1</b>    | heme oxygenase 1                                        | 1.58 | NM_002133    | chr22 : 35381066 - 35394214  |
| <b>ICAM1</b>    | intercellular adhesion molecule 1                       | 1.27 | NM_000201    | chr19 : 10270840 - 10286615  |
| <b>ITGA11</b>   | integrin subunit alpha 11                               | 0.87 | NM_001004439 | chr15 : 68301703 - 68432153  |
| <b>ITGA9</b>    | integrin subunit alpha 9                                | 0.65 | NM_002207    | chr3 : 37452321 - 37819790   |
| <b>LSP1</b>     | lymphocyte-specific protein 1                           | 0.86 | NM_001013255 | chr11 : 1870923 - 1892263    |
| <b>MRC2</b>     | mannose receptor, C type 2                              | 0.87 | NM_006039    | chr17 : 62627400 - 62693601  |
| <b>MSTN</b>     | myostatin                                               | 0.50 | NM_005259    | chr2 : 190055699 - 190062729 |
| <b>NFIC</b>     | nuclear factor I/C (CCAAT-binding transcription factor) | 0.86 | NM_005597    | chr19 : 3366566 - 3469217    |
| <b>NID1</b>     | nidogen 1                                               | 0.82 | NM_002508    | chr1 : 235975831 - 236065181 |
| <b>NR4A1</b>    | nuclear receptor subfamily 4 group A member 1           | 1.16 | NM_001202233 | chr12 : 52022831 - 52059507  |
| <b>PGF</b>      | placental growth factor                                 | 0.66 | NM_001207012 | chr14 : 74941829 - 74955764  |
| <b>PLAUR</b>    | plasminogen activator, urokinase receptor               | 1.16 | NM_001005376 | chr19 : 43646094 - 43670346  |
| <b>POSTN</b>    | periostin, osteoblast specific factor                   | 0.80 | NM_006475    | chr13 : 37562581 - 37598844  |
| <b>PPARA</b>    | peroxisome proliferator-activated receptor alpha        | 0.92 | NM_001001928 | chr22 : 46150595 - 46243756  |
| <b>PPARG</b>    | peroxisome proliferator-activated receptor gamma        | 1.25 | NM_138711    | chr3 : 12288936 - 12434356   |
| <b>PRKCH</b>    | protein kinase C, eta                                   | 0.81 | NM_006255    | chr14 : 61321442 - 61550980  |
| <b>PTEN</b>     | phosphatase and tensin homolog                          | 0.89 | NM_000314    | chr10 : 87863437 - 87971930  |
| <b>PTGS2</b>    | prostaglandin-endoperoxide synthase 2                   | 0.82 | NM_000963    | chr1 : 186671811 - 186680427 |
| <b>SNAI2</b>    | snail family zinc finger 2                              | 0.80 | NM_003068    | chr8 : 48917680 - 48921440   |
| <b>TGFB3</b>    | transforming growth factor beta 3                       | 0.83 | NM_003239    | chr14 : 75958096 - 75982022  |
| <b>THBD</b>     | thrombomodulin                                          | 1.55 | NM_000361    | chr20 : 23045632 - 23049664  |
| <b>TNFRSF1A</b> | tumor necrosis factor receptor superfamily member 1A    | 0.89 | NM_001065    | chr12 : 6328756 - 6342117    |
| <b>VAV3</b>     | vav guanine nucleotide exchange factor 3                | 1.36 | NM_006113    | chr1 : 107571159 - 107964923 |

|              |                                      |      |              |                             |
|--------------|--------------------------------------|------|--------------|-----------------------------|
| <b>VEGFA</b> | vascular endothelial growth factor A | 0.85 | NM_001204385 | chr6 : 43770208 - 43786486  |
| <b>VTN</b>   | vitronectin                          | 0.70 | NM_000638    | chr17 : 28367277 - 28370352 |

### Notch pathway (Related to Figure 4)

|               |                                               |      |              |                               |
|---------------|-----------------------------------------------|------|--------------|-------------------------------|
| <b>CREBBP</b> | CREB binding protein                          | 0.92 | NM_004380    | chr16 : 3725054 - 3880120     |
| <b>DTX3L</b>  | deltex 3 like, E3 ubiquitin ligase            | 0.89 | NM_138287    | chr3 : 122564337 - 122575202  |
| <b>DTX4</b>   | deltex 4, E3 ubiquitin ligase                 | 0.64 | NM_015177    | chr11 : 59172338 - 59208587   |
| <b>EP300</b>  | E1A binding protein p300                      | 0.90 | NM_001429    | chr22 : 41092609 - 41180077   |
| <b>HES1</b>   | hes family bHLH transcription factor 1        | 0.81 | NM_005524    | chr3 : 194136141 - 194138612  |
| <b>JAG1</b>   | jagged 1                                      | 0.78 | NM_000214    | chr20 : 10637683 - 10674046   |
| <b>MAML2</b>  | mastermind like transcriptional coactivator 2 | 0.87 | NM_032427    | chr11 : 95976592 - 96343180   |
| <b>MAML3</b>  | mastermind like transcriptional coactivator 3 | 0.79 | NM_018717    | chr4 : 139716390 - 140154079  |
| <b>MIB1</b>   | mindbomb E3 ubiquitin protein ligase 1        | 0.93 | NM_020774    | chr18 : 21741328 - 21870957   |
| <b>NCOR2</b>  | nuclear receptor corepressor 2                | 0.93 | NM_001206654 | chr12 : 124324410 - 124567464 |
| <b>NOTCH3</b> | notch 3                                       | 0.84 | NM_000435    | chr19 : 15159632 - 15200981   |

### Cholesterol pathway (Related to Figure 5)

|               |                                                                              |      |              |                              |
|---------------|------------------------------------------------------------------------------|------|--------------|------------------------------|
| <b>ABCA1</b>  | ATP binding cassette subfamily A member 1                                    | 1.26 | NM_005502    | chr9 : 104781002 - 104928246 |
| <b>DHCR24</b> | 24-dehydrocholesterol reductase                                              | 1.48 | NM_014762    | chr1 : 54849626 - 54887248   |
| <b>DHCR7</b>  | 7-dehydrocholesterol reductase                                               | 1.97 | NM_001360    | chr11 : 71434410 - 71448431  |
| <b>FDFT1</b>  | farnesyl-diphosphate farnesyltransferase 1                                   | 1.25 | NM_001287744 | chr8 : 11795572 - 11839309   |
| <b>FDPS</b>   | farnesyl diphosphate synthase                                                | 1.57 | NM_002004    | chr1 : 155308747 - 155320666 |
| <b>HMGCR</b>  | 3-hydroxy-3-methylglutaryl-CoA reductase                                     | 1.53 | NM_001130996 | chr5 : 75337167 - 75362101   |
| <b>HMGCS1</b> | 3-hydroxy-3-methylglutaryl-CoA synthase 1                                    | 1.95 | NM_001098272 | chr5 : 43287469 - 43313512   |
| <b>HSD3B7</b> | hydroxy-delta-5-steroid dehydrogenase, 3 beta- and steroid delta-isomerase 7 | 1.41 | NM_001142777 | chr16 : 30985197 - 30989152  |
| <b>IDI1</b>   | isopentenyl-diphosphate delta isomerase 1                                    | 1.57 | NM_004508    | chr10 : 1039419 - 1049366    |

|               |                                                            |      |              |                               |
|---------------|------------------------------------------------------------|------|--------------|-------------------------------|
| <b>INSIG1</b> | insulin induced gene 1                                     | 1.98 | NM_005542    | chr7 : 155297775 - 155310235  |
| <b>LDLR</b>   | low density lipoprotein receptor                           | 2.04 | NM_001195799 | chr19 : 11089361 - 11133829   |
| <b>LSS</b>    | lanosterol synthase (2,3-oxidosqualene-lanosterol cyclase) | 1.27 | NM_001145437 | chr21 : 46189123 - 46228824   |
| <b>MVK</b>    | mevalonate kinase                                          | 1.53 | NM_000431    | chr12 : 109573694 - 109597270 |
| <b>NPC1</b>   | Niemann-Pick disease, type C1                              | 1.56 | NM_000271    | chr18 : 23531498 - 23586617   |
| <b>NPC2</b>   | Niemann-Pick disease, type C2                              | 1.25 | NM_006432    | chr14 : 74479939 - 74493381   |
| <b>NSDHL</b>  | NAD(P) dependent steroid dehydrogenase-like                | 1.21 | NM_001129765 | chrX : 152830966 - 152869363  |
| <b>PCSK9</b>  | proprotein convertase subtilisin/kexin type 9              | 2.85 | NM_174936    | chr1 : 55039475 - 55064853    |
| <b>SQLE</b>   | squalene epoxidase                                         | 1.48 | NM_003129    | chr8 : 124998477 - 125022283  |
| <b>SREBF1</b> | sterol regulatory element binding transcription factor 1   | 1.77 | NM_001005291 | chr17 : 17811348 - 17837011   |
| <b>SREBF2</b> | sterol regulatory element binding transcription factor 2   | 1.37 | NR_103834    | chr22 : 41833078 - 41907308   |

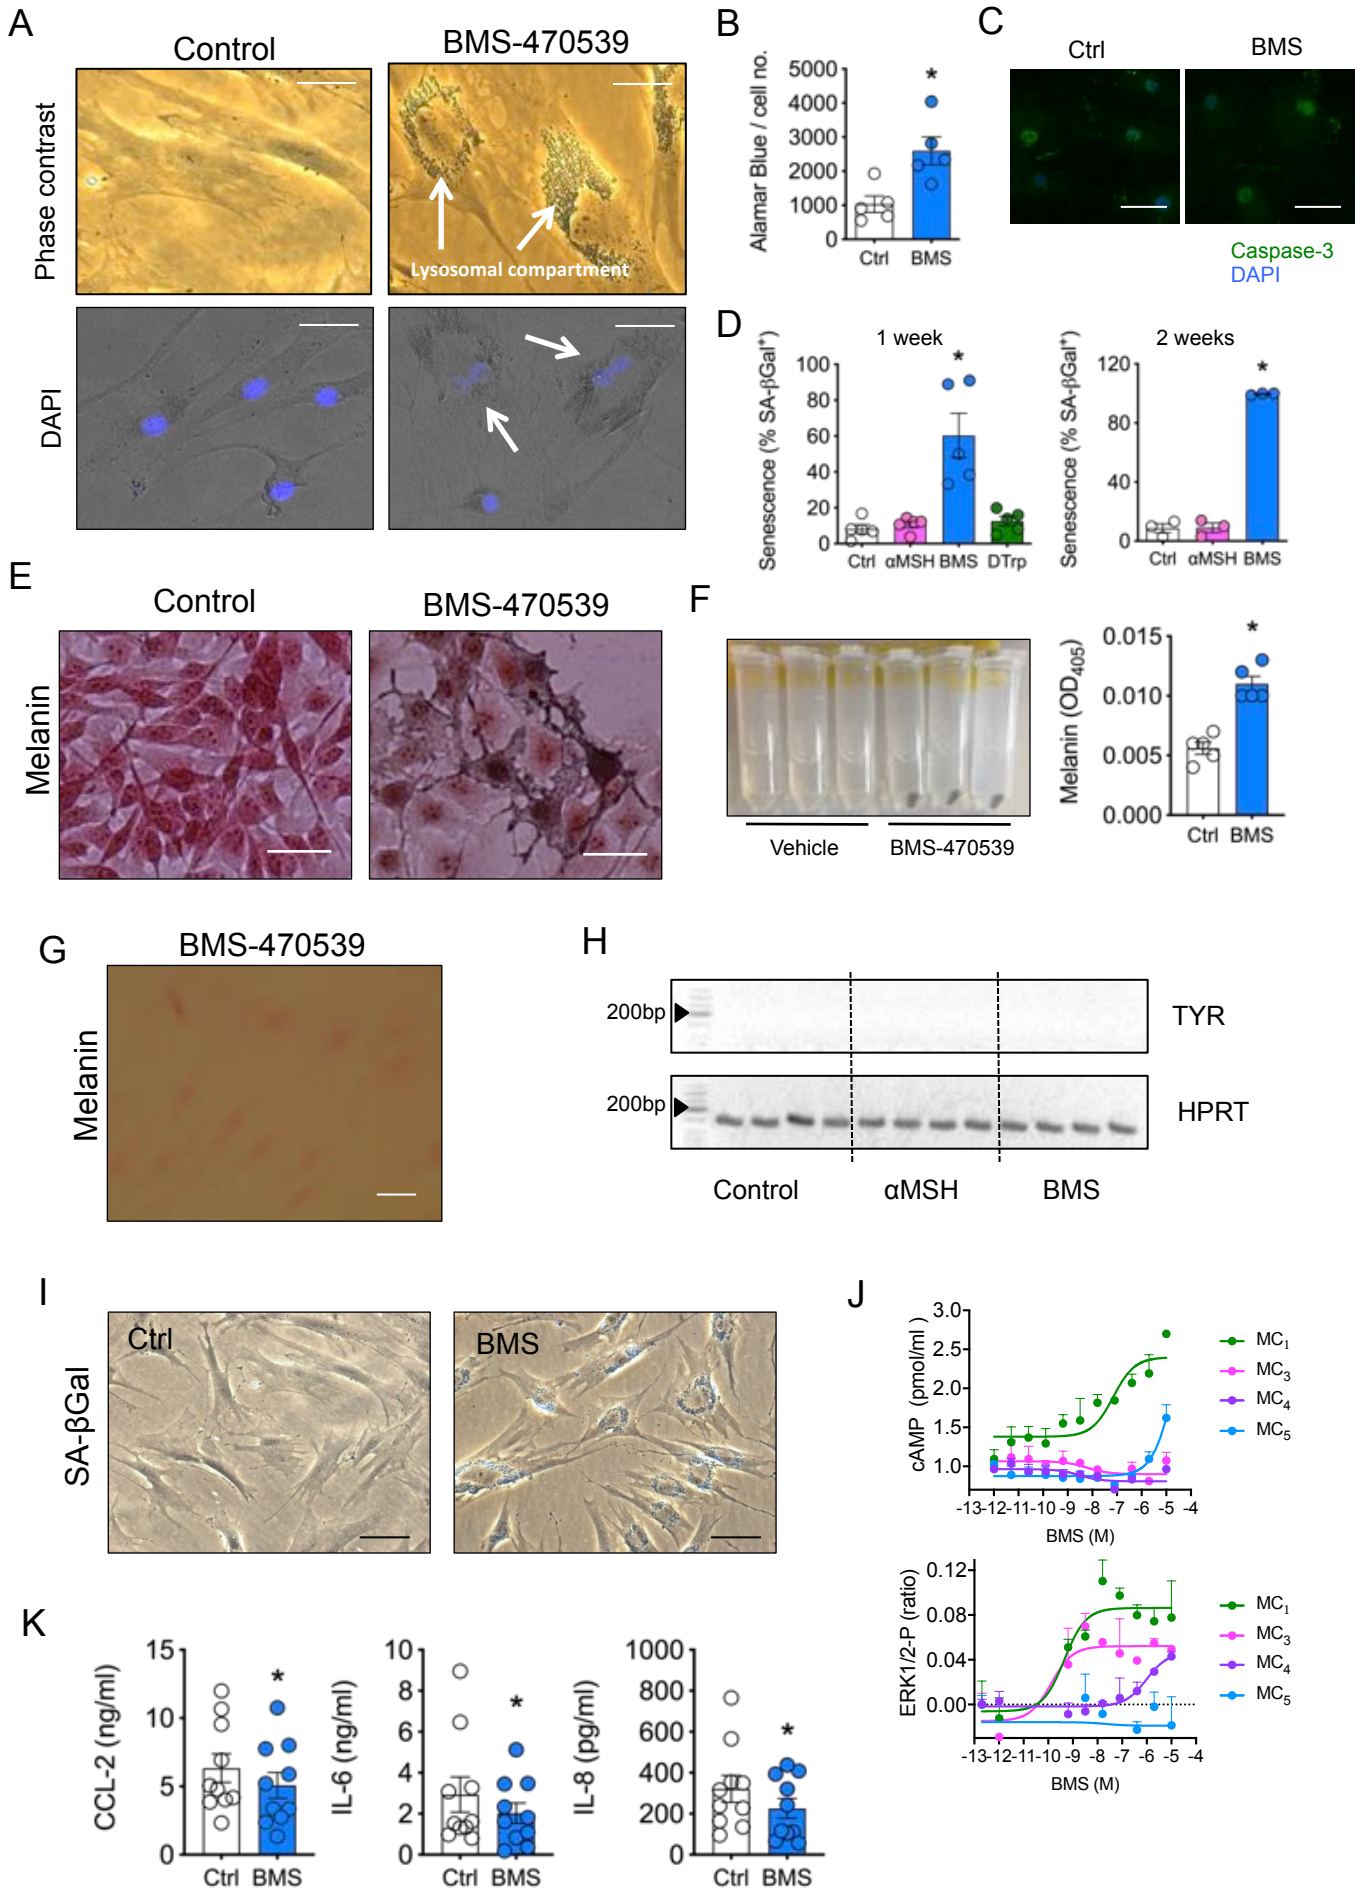

**Supplementary Figure 1. Effect of BMS on fibroblast senescence, melanin production and signalling.**

(A) Images of SF (control or treated with 1 $\mu$ M BMS) showing expansion of lysosomal compartment and presence of bi-nucleated cells (DAPI staining). Scale bars indicate 100 $\mu$ m.

(B) SF were treated with BMS (1 $\mu$ M) for 7 days. Alamar blue assay was used as an indicator of cell health and metabolic activity. Data represent mean values  $\pm$ SE (n=5, Student's t-test vs. control).

(C) Cleaved caspase-3 expression was assessed by immunofluorescence on SF (control, or treated with 1 $\mu$ M BMS for 7 days). Scale bars indicate 200 $\mu$ m.

(D) SA- $\beta$ Gal was determined 7 or 14 days after drug treatment with 1 $\mu$ M BMS, 10 $\mu$ M  $\alpha$ MSH and 10 $\mu$ M [D-Trp<sup>8</sup>]- $\gamma$ MSH. Senescence was analyzed by SA- $\beta$ Gal<sup>+</sup> staining. Data represent mean values  $\pm$ SE (n=3-5, one-way ANOVA vs. control).

(E) Melanin synthesis was analyzed on B16-F10 mouse melanocytes treated with 1 $\mu$ M BMS for 4 days using Fontana-Masson staining. Scale bars indicate 1000 $\mu$ m.

(F) B16-F10 melanocytes treated with 1 $\mu$ M BMS for 4 days were centrifuged to visualize pellet colour denoting melanin synthesis. Melanin was further quantified on supernatants by measuring absorbance at 405nm. Data represent mean values  $\pm$ SE (n=5, Student's t-test vs. control).

(G) SF were stained with Fontana-Masson after treatment with 1 $\mu$ M BMS for 7 days. Scale bar indicate 200 $\mu$ m.

(H) Gene expression of tyrosinase (TYR) was analyzed on SF treated with 1 $\mu$ M BMS or 10 $\mu$ M  $\alpha$ MSH. HPRT expression was used as control.

(I) Senescence was assessed by SA- $\beta$ Gal<sup>+</sup> staining on BMS (1 $\mu$ M) treated skin fibroblasts. Scale bars indicate 200 $\mu$ m.

(J) Signaling via cAMP (15 min stimulation) and ERK-phosphorylation (5 min stimulation) induced by BMS was studied on HEK293 cells transiently transfected with *MC1R*, *MC3R*, *MC4R* or *MC5R*. Data represent mean values  $\pm$ SE (n=2).

(K) Cytokines release was evaluated by ELISA on supernatants from senescent SF treated with 1 $\mu$ M BMS for 7 days. Data represent mean values  $\pm$ SE (n=10, Student's t-test vs. control).

Source data are provided as Supplementary Source Data file.

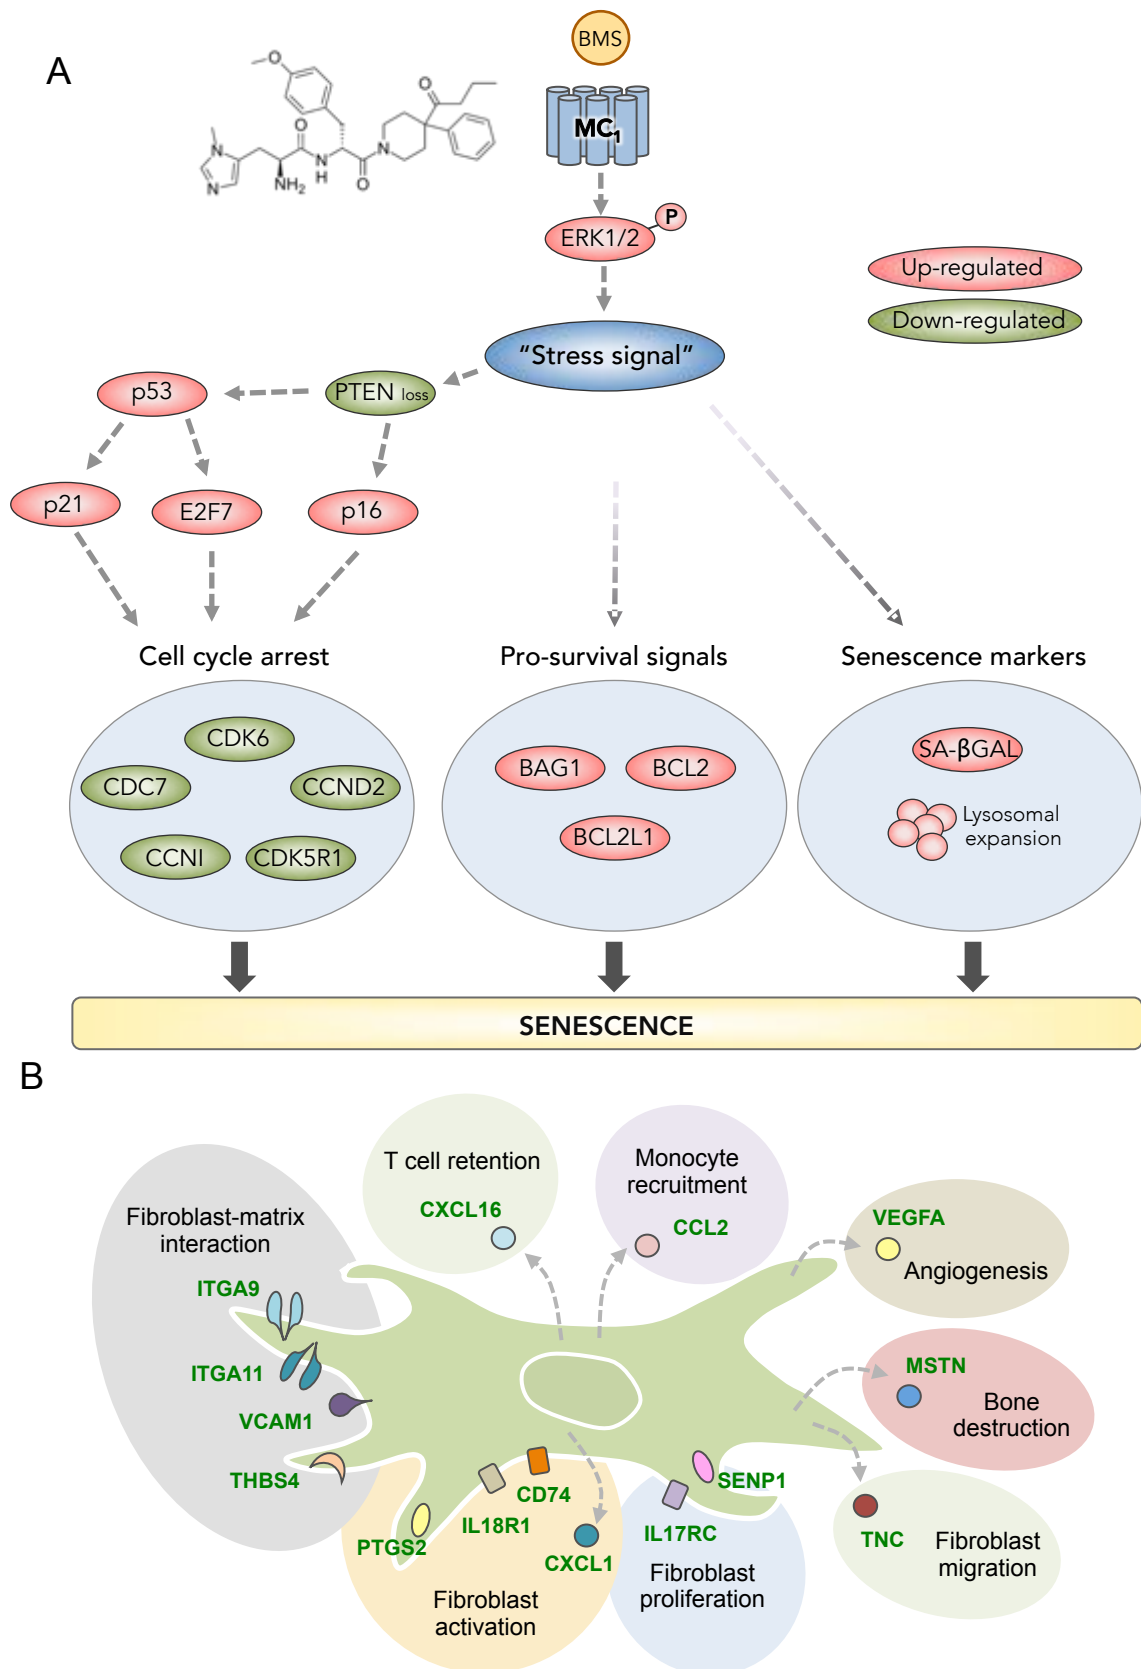

**Supplementary Figure 2. Genes identified by RNAseq associated with senescence and SF activation.**

(A) Senescence-related genes reported on Figure 3C and other senescence markers identified, such as p53 (by western blot) and SA-βGal (by histochemistry). The chemical structure of BMS-470539 is shown.

(B) Downregulation of genes related to SF activation and aggressiveness reported on Figure 3G.



A

p16<sup>INK4</sup>

H&E

Toluidine Blue

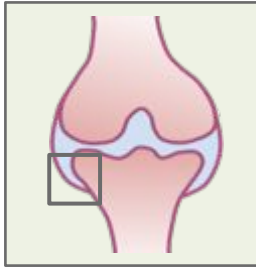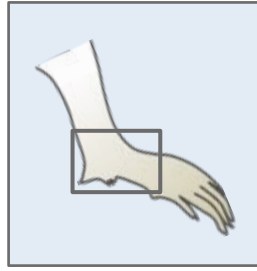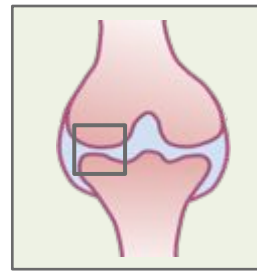

B

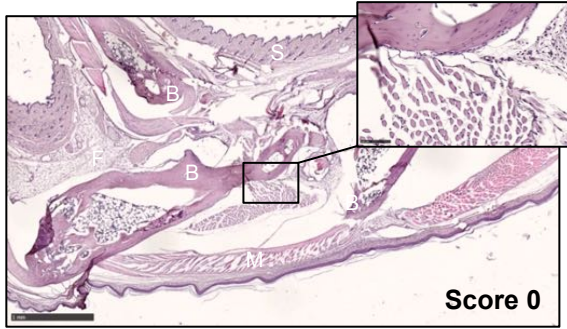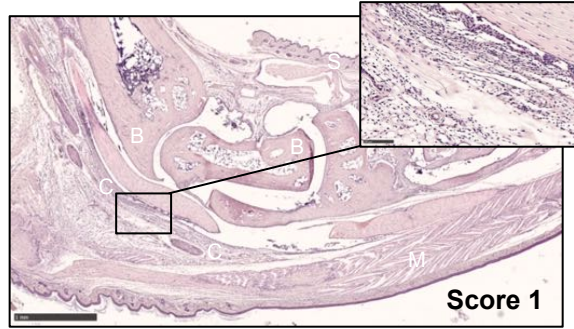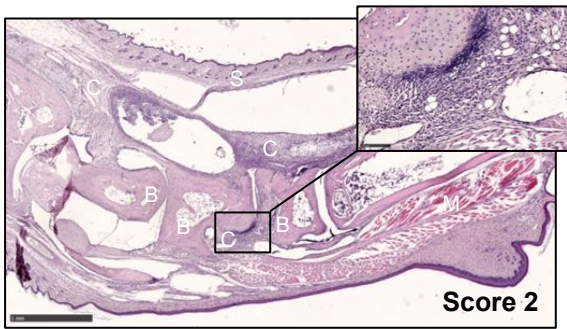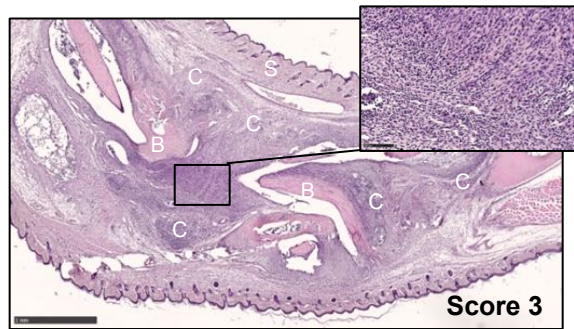

H&E

Score 0

Score 1

Score 2

Score 3

C

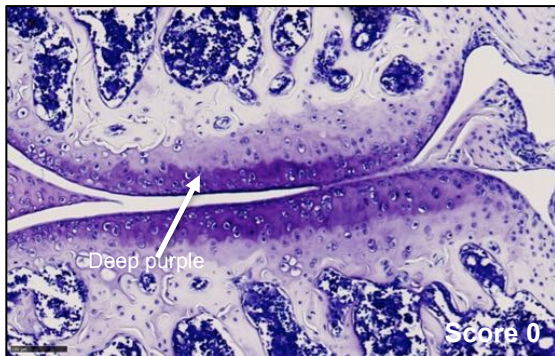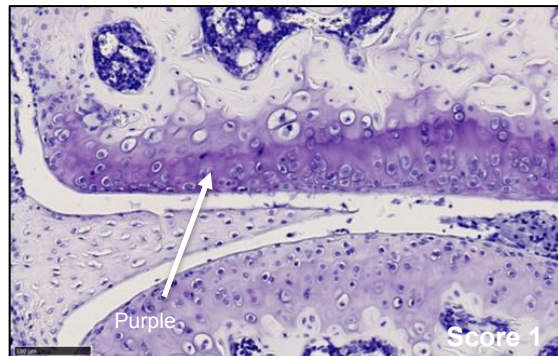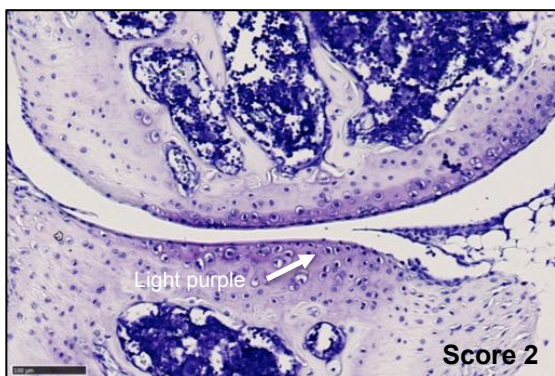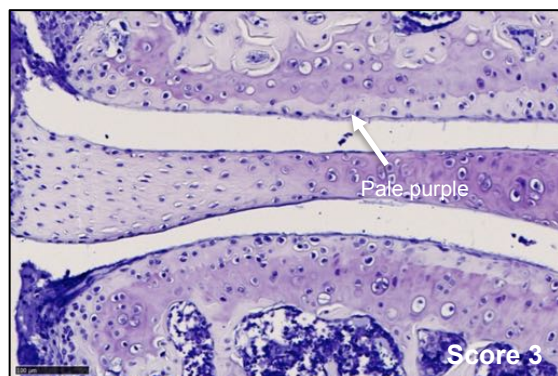

Toluidine Blue

Score 0

Score 1

Score 2

Score 3

**Supplementary Figure 3. Histological analysis on mouse joints.**

(A) The location where images for IF and histological analysis on Figure 5 were taken are shown.

(B) Scale used for scoring degree of cell infiltration. Cell infiltration was analysed by H&E staining. Large images were taken at 2.5X magnification and scale bars indicate 1 mm. Small inserts images were taken at 20X magnification and scale bars indicate 100µm. B= bone, C= cell infiltration, F= fat, M= muscle, S= skin.

(C) Scale used for scoring degree of cartilage integrity. Cartilage integrity was analysed by toluidine blue staining. Deep purple colour indicates intact cartilage while gradual loss of colour accounts for loss of sulphated proteoglycans, indicative of cartilage damage. Images were taken at 20X magnification. Scale bars indicate 100µm.

**Supplementary Figure 4. Anti-mouse p16<sup>INK4</sup> antibody validation.**

(A) p16<sup>INK4</sup> expression was assessed by immunofluorescence on knee joints on mice treated with BMS. The Abcam ab54210 (clone 2D9A12) -in red-, was compared to the knock-out validated antibody from the CNIO (clone PABLO33B) -in green-. Scale bars indicate 200µm (20X) and 100µm (40X).

(B) p16<sup>INK4</sup> expression was assessed by immunofluorescence on 4T1 and NIH 3T3 cells three days after treatment with UV light. Scale bars indicate 200µm.

A

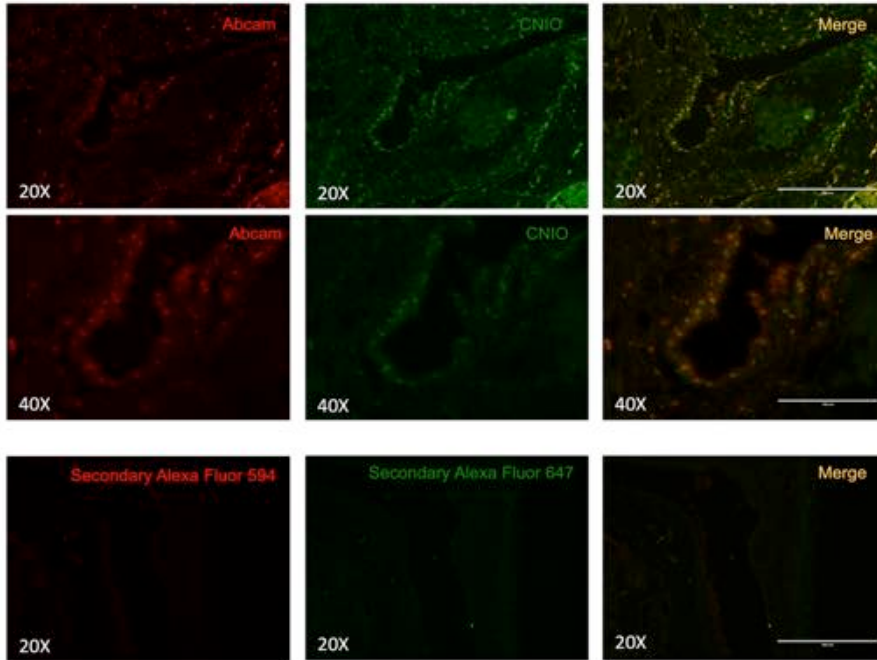

B

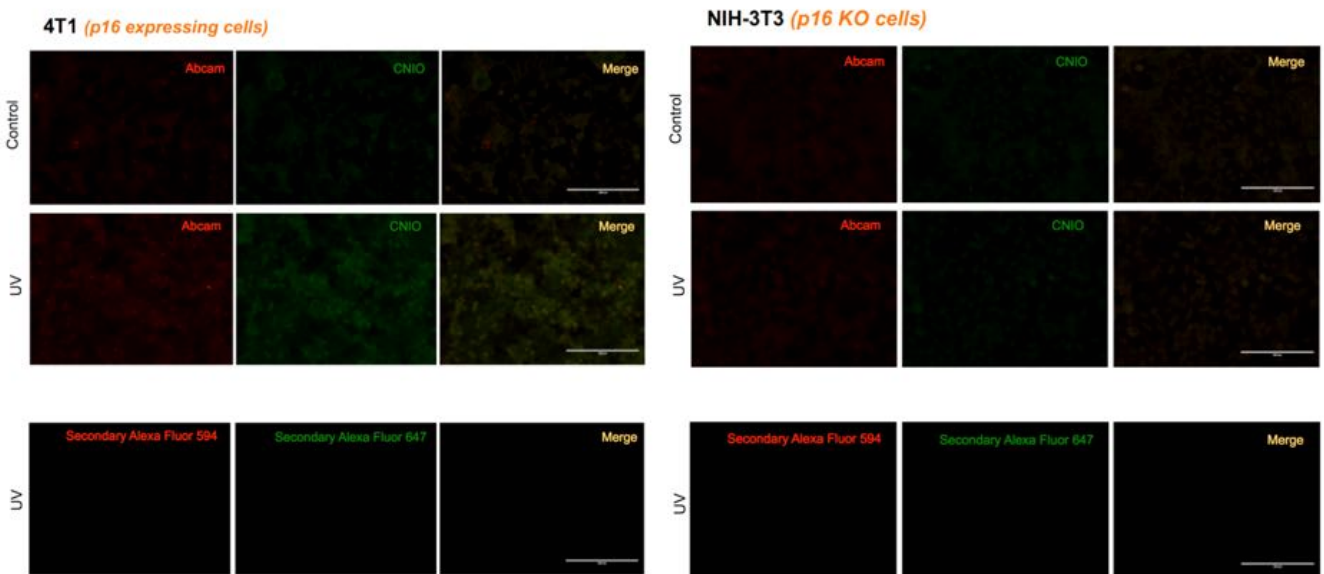

DAPI  
p16<sup>INK4</sup>

200µm

### Articular joint

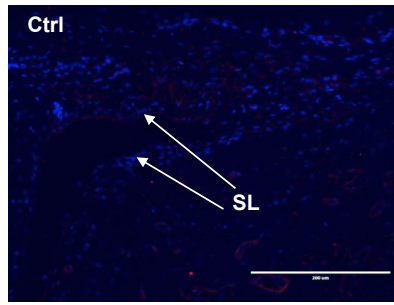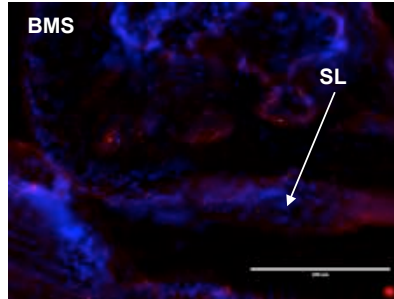

### Brain

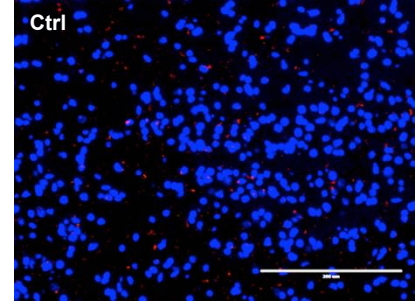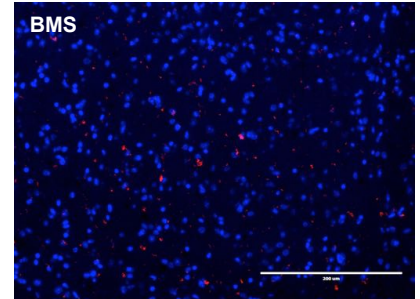

### Fat

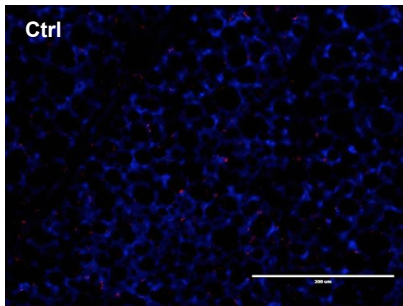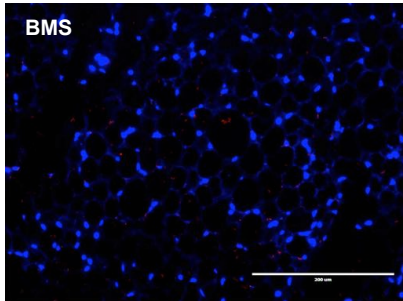

### Kidney

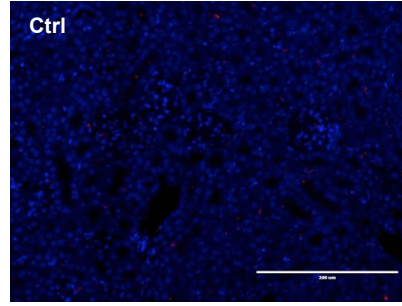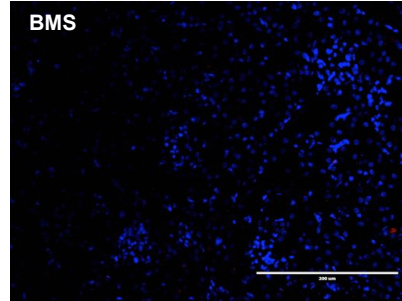

### Liver

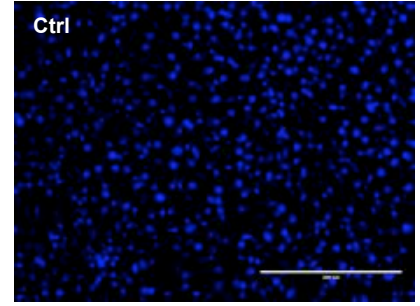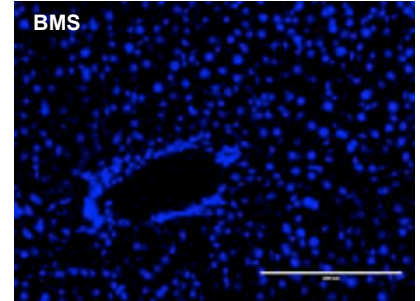

### Lung

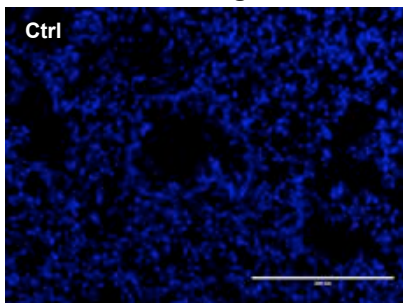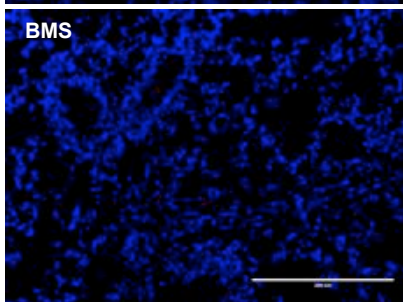

### Skin

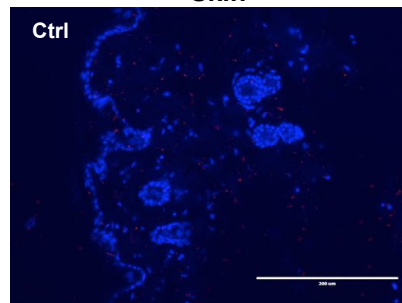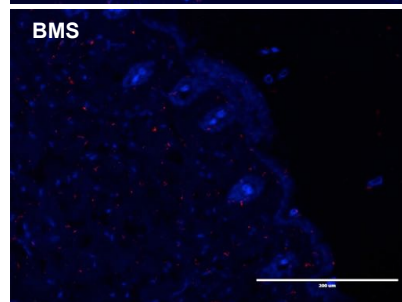

### Spleen

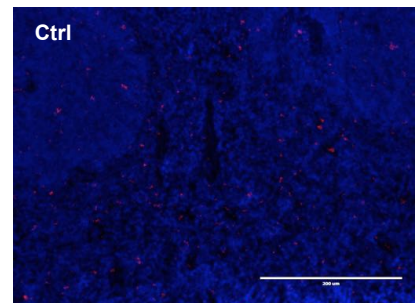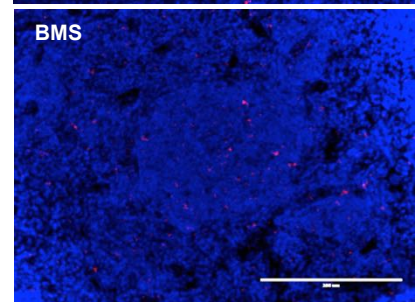

**Supplementary Figure 5. Expression of p16<sup>INK4</sup> on mouse tissues.**

To account for off-target effects, p16<sup>INK4</sup> expression was assessed by immunofluorescence on brain, fat, kidney, liver, lung, skin and spleen on mice treated with 18mg/kg BMS intraperitoneally for 6 days, compared with control (vehicle treated) mice. Tissues were formalin-fixed and embedded in paraffin. Scale bars indicate 200µm.
